# Supplementary material
Source: PubMed Central journal article supplement (PMC6719305)

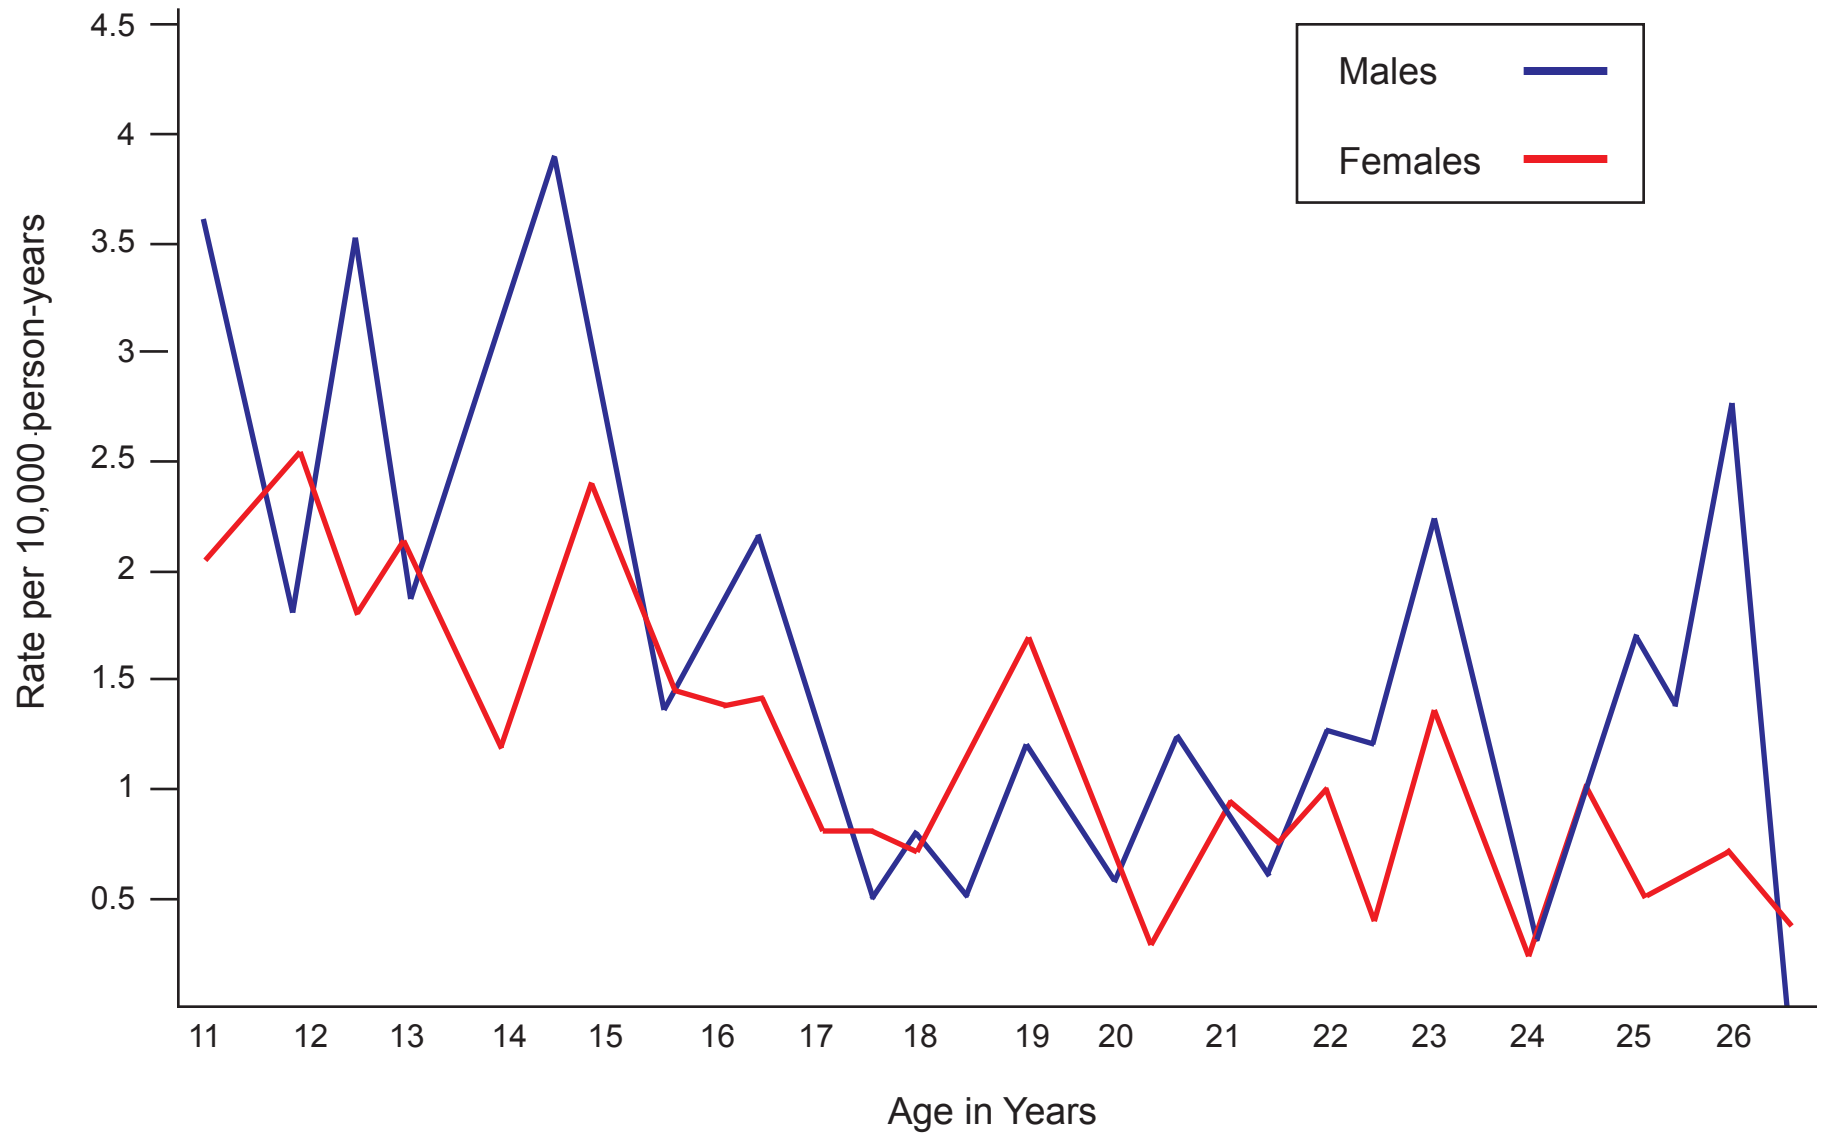

Supplement: NIHMS1048045-supplement-2.pdf [file NIHMS1048045-supplement-2.pdf]
